1 **A non-classical mechanism of  $\beta$ -lactam resistance in Methicillin-Resistant *Staphylococcus***  
2 ***aureus* (MRSA) and its effect on virulence**

3 **Running title: Role of PBP4 in  $\beta$ -lactam resistance and virulence**

4 Nidhi Satishkumar<sup>1,2</sup>, Li-Yin Lai<sup>1,2</sup>, Nagaraja Mukkayyan<sup>1,2</sup>, Bruce E. Vogel<sup>3</sup>, Som S.

5 Chatterjee<sup>1,2\*</sup>

6 <sup>1</sup>Department of Microbial Pathogenesis, School of Dentistry, University of Maryland Baltimore,

7 USA

8 <sup>2</sup>Institute of Marine and Environmental Technology (IMET), Baltimore, USA

9 <sup>3</sup>Center for Biomedical Engineering and Technology, University of Maryland School of Medicine,

10 University of Maryland Baltimore, USA

11

12 \*Corresponding Author:

13 Som S. Chatterjee

14 Columbus Center

15 701 Pratt Street

16 Baltimore, MD 21202

17 Tel: 410-234-8890

18 e-mail: [schatterjee@umaryland.edu](mailto:schatterjee@umaryland.edu)

19 **Abstract**

20 Methicillin-Resistant *Staphylococcus aureus* (MRSA) are pathogenic bacteria that are infamously  
21 resistant to  $\beta$ -lactam antibiotics, a property attributed to the *mecA* gene. Recent studies have  
22 reported that mutations associated with the promoter region of *pbp4* demonstrated high levels of  
23  $\beta$ -lactam resistance, suggesting the role of PBP4 as an important non-*mecA* mediator of  $\beta$ -lactam  
24 resistance. The *pbp4* promoter-associated mutations have been detected in strains with or without  
25 *mecA*. Our previous studies that were carried out in strains devoid of *mecA* described that *pbp4*  
26 promoter-associated mutations lead to PBP4 overexpression and  $\beta$ -lactam resistance. In this  
27 study, by introducing various *pbp4* promoter-associated mutations in the genome of an MRSA  
28 strain, we demonstrate that PBP4 overexpression can supplement *mecA*-associated resistance  
29 in *S. aureus* and can lead to increased  $\beta$ -lactam resistance. The promoter and regulatory region  
30 of *pbp4* is shared with a divergently transcribed gene, *abcA*, which encodes for a multidrug  
31 exporter. We demonstrate that the promoter mutations caused an upregulation of *pbp4* and  
32 downregulation of *abcA*, confirming that the resistant phenotype is associated with PBP4  
33 overexpression only. PBP4 has also been associated with staphylococcal pathogenesis,  
34 however, its exact role remains unclear. Using a *C. elegans* model, we demonstrate that strains  
35 having increased PBP4 expression are less virulent compared to wild-type strains, suggesting  
36 that  $\beta$ -lactam resistance mediated via PBP4 likely comes at the cost of virulence.

37 **Importance**

38 Our study demonstrates the ability of PBP4 to be an important mediator of  $\beta$ -lactam resistance in  
39 not only Methicillin-susceptible *Staphylococcus aureus* (MSSA) background strains as previously  
40 demonstrated, but also in MRSA strains. When present together, PBP2a and PBP4  
41 overexpression can produce increased levels of  $\beta$ -lactam resistance, causing complications in  
42 treatment. Thus, this study suggests the importance of monitoring PBP4-associated resistance in  
43 clinical settings, as well as understanding the mechanistic basis of associated resistance, so that  
44 treatments targeting PBP4 may be developed. This study also demonstrates that *S. aureus*  
45 strains with increased PBP4 expression are less pathogenic, providing important hints about the  
46 role of PBP4 in *S. aureus* resistance and pathogenesis.

## 47 Introduction

48 *Staphylococcus aureus* is a Gram-positive pathogen that can cause skin and soft tissue infections  
49 (SSTIs), bacteremia, osteomyelitis, and sepsis in humans (1). Along with being equipped with a  
50 wide array of virulence factors, *S. aureus* is also resistant to a wide range of antibiotics, making  
51 infections difficult to treat (2). In particular, Methicillin-Resistant *Staphylococcus aureus* (MRSA)  
52 is infamous for being resistant to  $\beta$ -lactams, resulting in over 120,000 deaths in 2019 globally (3).  
53  $\beta$ -lactams are a class of antibiotics known for their safety, efficacy and tissue distribution which  
54 makes them the most commonly prescribed antibiotics (4).  $\beta$ -lactams bind to Penicillin Binding  
55 Proteins (PBPs), which are integral proteins involved in the final stages of cell wall synthesis. The  
56 binding of  $\beta$ -lactams to PBPs causes their inactivation, leading to weakening of the cell wall and  
57 subsequently, cell death (5). MRSA contains the gene *mecA*, which encodes PBP2a, a PBP that  
58 has decreased affinity towards  $\beta$ -lactams, allowing cells to survive even in high concentrations of  
59  $\beta$ -lactams (2).

60 Historically, resistance mechanisms in *S. aureus* have been acquired in waves. With the  
61 introduction of every new generation of  $\beta$ -lactams, *S. aureus* has been able to develop new  
62 resistance mechanisms (2). This ability of *S. aureus* to constantly develop resistance mechanisms  
63 makes it important to focus on other, novel mechanisms of resistance. Keeping this in mind, our  
64 previous studies involved serial passaging of strains in increasing amounts of  $\beta$ -lactams with the  
65 aim of identifying non-*mecA* mechanisms of resistance (6). We determined that mutations  
66 associated with the promoter region of PBP4 were largely prevalent in resistant strains (6, 7).  
67 Various studies by other groups also identified *pbp4* associated mutations in laboratory-generated  
68 (8, 9) as well as in clinically isolated (10, 11) resistant strains of both, MRSA and MSSA  
69 backgrounds, suggesting the clinical relevance of these mutations. PBP4, a non-essential, low  
70 molecular weight PBP in *S. aureus*, is produced in low amounts, and its role in resistance or  
71 pathogenesis is not very well described (12). We previously demonstrated that *pbp4* promoter-

72 associated mutations led to significant  $\beta$ -lactam resistance in strains devoid of *mecA* by causing  
73 increased PBP4 expression and enhanced cell wall cross-linking (7). However, the effect of these  
74 mutations in strains containing *mecA* is unknown. Thus, in this study, we inspected whether  
75 PBP4, through the means of overexpression, supplemented *mecA*-mediated  $\beta$ -lactam resistance.  
76 We used the strain SF8300, a derivative of USA300, which is one of the most prominent  
77 community-associated MRSA (CA-MRSA) strains detected in the U.S.(2). *pbp4* promoter-  
78 associated mutations that were detected in a laboratory passaged, resistant strain that was devoid  
79 of *mecA* (namely CRB) and in a resistant strain containing *mecA* (namely CRT) were introduced  
80 in SF8300 (6). Further, a *pbp4* promoter-associated mutation detected in a  $\beta$ -lactam resistant,  
81 clinical isolate (namely Strain 1) was also used in this study (13). Using these promoter mutants,  
82 we demonstrated that *pbp4* promoter-associated mutations leads to PBP4 overexpression and  
83 increased  $\beta$ -lactam resistance in MRSA strains in a mechanism similar to what was previously  
84 shown in MSSA strains (7, 13).

85 *pbp4* shares its promoter and regulatory region with *abcA*, a gene that encodes for an ATP-  
86 binding cassette transporter protein. ABC transporters are notorious for enabling resistance to  
87 chemotherapeutic agents in both prokaryotes and eukaryotes via export activity. Since *AbcA* has  
88 previously been associated with antibiotic resistance (14), we were interested in understanding  
89 whether the promoter-associated mutations altered *abcA* expression that potentially led to *AbcA*-  
90 mediated  $\beta$ -lactam resistance. However, our results indicated that while the promoter-associated  
91 mutations led to increased *pbp4* expression, they resulted in downregulation of *abcA*, indicating  
92 that *AbcA* did not have any role in  $\beta$ -lactam resistance and that the resistance phenotype  
93 observed in the promoter mutants was solely attributed to PBP4.

94 Along with  $\beta$ -lactam resistance, PBP4 has recently been associated with virulence in previous  
95 studies. However, the exact role of PBP4 in virulence remains unclear, as these studies had  
96 contrasting reports (15, 16). In order to get a better understanding of the role of PBP4 in virulence,

97 we used a *C. elegans* infection model and demonstrated that MRSA strains containing *pbp4*  
98 promoter-associated mutations had decreased virulence compared to the wild-type strain.

99 Our findings suggest the importance of monitoring PBP4-associated resistance in both MRSA  
100 and MSSA strains and indicate that treatment options would potentially have to consider targeting  
101 both PBP2a and PBP4, as when present, both the proteins independently mediate  $\beta$ -lactam  
102 resistance via distinct mechanisms leading to increased resistance. Our results also confirm that  
103 promoter-associated mutations only allow for PBP4 overexpression and do not facilitate AbcA-  
104 mediated resistance, indicating that PBP4-associated resistance has the potential of being a  
105 prominent resistance mechanism in the future. Finally, our results also provide important clues  
106 associated with the role of PBP4 in virulence and suggest that strains with increased PBP4 may  
107 have decreased virulence, a phenomenon that needs to be studied further in details in the future.

## 108 **Results**

### 109 ***pbp4* promoter-associated mutations led to increased PBP4 expression and $\beta$ -lactam** 110 **resistance in MRSA strains**

111 Our previous studies demonstrated that *pbp4* promoter-associated mutations led to PBP4  
112 overexpression that subsequently resulted in  $\beta$ -lactam resistance (7, 13). These studies were  
113 performed by introducing promoter-associated mutations into strains devoid of *mecA*. Using allelic  
114 replacement, we created isogenic mutants by introducing three different, previously detected  
115 mutations in the *pbp4* promoter region of SF8300 (13, 17). Of these, two mutations were detected  
116 in laboratory-generated resistant strains as a result of a passaging experiment. The first mutation  
117 was detected in the strain CRB, and was a 36 bp duplication 290 bps upstream of the *pbp4* start  
118 codon. This mutation was introduced into the *pbp4*-promoter region of SF8300, giving rise to the  
119 strain SF8300 *Ppbp4\** (CRB). Similarly, insertion of mutations detected in the strain CRT (a  
120 thymine insertion 377 bp upstream the start codon and a 90 bp deletion 275 bp upstream the start  
121 codon) into the *pbp4*-promoter region of SF8300 produced SF8300 *Ppbp4\** (CRT). The third  
122 mutation was one detected in a clinically-isolated strain (10, 13), namely Strain 1, and consisted  
123 of a T to A substitution 266 bp upstream the start codon. The introduction of this mutation in  
124 SF8300 gave rise to SF8300 *Ppbp4\** (Strain 1) (**Figure 1a**).

125 In order to determine if introduction of these mutations affected PBP4 expression in the selected  
126 isogenic strains, immunoblotting was performed using an antibody specific to PBP4. Compared  
127 to the wild-type (WT) strain SF8300, strains containing promoter-associated mutations had  
128 significantly increased expression of PBP4 (**Figure 1b**). SF8300 *Ppbp4\** (CRB) had the highest  
129 amount of expressed protein, followed by SF8300 *Ppbp4\** (CRT) and SF8300 *Ppbp4\** (Strain 1).  
130  $\Delta pbp4$  was used as a control, for which there was no PBP4 band detected (**Figure 1c**). These  
131 results indicated that PBP4 overexpression occurred as a result of promoter-associated mutations  
132 in MRSA strains, in a manner similar to what was previously detected in MSSA strains (7, 13).

133 Following confirmation of PBP4 overexpression, we performed a growth assay in presence of  $\beta$ -  
134 lactams such as nafcillin and oxacillin to examine the effect of PBP4 overexpression on  $\beta$ -lactam  
135 resistance. When exposed to  $\beta$ -lactams, strains with promoter-associated mutations were able to  
136 survive significantly better in presence of either of the antibiotics, when compared to the WT and  
137  $\Delta pbp4$  strains for 4  $\mu\text{g}/\text{mL}$  nafcillin (**Figure 1d**) and 8  $\mu\text{g}/\text{mL}$  oxacillin (**Figure 1e**). The wild-type  
138 strain as well as the strains with promoter-associated mutations all had similar growth patterns in  
139 absence of  $\beta$ -lactams (**Figure 1f**). Taken together, these results suggested that promoter-  
140 associated mutations led to PBP4 overexpression and  $\beta$ -lactam resistance in MRSA background,  
141 similar to what was previously demonstrated in MSSA background strains (7, 13).

142

143 ***pbp4* promoter-associated mutations led to increased expression of *pbp4* and decreased**  
144 **expression of *abcA***

145 The *pbp4* gene shares its 420 bp promoter and regulatory region with a neighboring, divergently  
146 transcribed gene, namely *abcA* (18). *AbcA* is an ATP Binding Cassette-like transporter protein  
147 that has been reported to export various chemicals, dyes and antibiotics, thus contributing to  
148 antibiotic resistance in *S. aureus* (14, 19). It also has the ability to export Phenol Soluble Modulins  
149 (PSMs) that are cytolytic toxins, thus also plays a role in *S. aureus* virulence (20). Since the  
150 mutations detected upstream of *pbp4* start codon also lie upstream of the *abcA* start codon  
151 (**Figure 1a**), we were interested in whether they caused any alterations in the expression of *abcA*  
152 that subsequently contributed to  $\beta$ -lactam resistance in *S. aureus*. We thus performed qRT-PCR  
153 to examine the expression pattern of *pbp4* and *abcA* in presence of promoter-associated  
154 mutations. At 4 hours, *pbp4* transcripts were expressed in very low amounts in SF8300 WT, and  
155 were significantly increased in strains containing promoter-associated mutations (**Figure 2a**;  
156 SF8300 *Ppbp4* (WT) versus SF8300 *Ppbp4\** (CRB), P-value < 0.0001, SF8300 WT versus  
157 SF8300 *Ppbp4\** (CRT), P-value < 0.0001, SF8300 WT versus SF8300 *Ppbp4\** (Strain 1), P-value



158 = 0.0004). On the other hand, *abcA* transcripts had increased expression in SF8300 WT but had  
159 significantly decreased expression in strains containing promoter-associated mutations (**Figure**  
160 **2b**; SF8300 WT versus SF8300 *Ppbp4\** (CRB), P-value = 0.0161, SF8300 WT versus SF8300  
161 *Ppbp4\** (CRT), P-value = 0.0016, SF8300 WT versus SF8300 *Ppbp4\** (Strain 1), P-value =  
162 0.0203). These results indicate that while the promoter-associated mutations caused  
163 overexpression of *pbp4*, but led to a downregulation of *abcA*. Thus, the increased  $\beta$ -lactam  
164 resistance seen due to the promoter-associated mutations was solely attributed to PBP4  
165 overexpression and not *AbcA* activity. The results of qRT-PCR also corresponded with the results  
166 seen with PBP4 immunoblotting in terms of different levels of PBP4 overexpression, which  
167 indicated that SF8300 *Ppbp4\** (CRB) had the highest amount of PBP4 overexpression, followed  
168 by SF8300 *Ppbp4\** (CRT) and SF8300 *Ppbp4\** (Strain 1) (**Figure 2a**, **Figure 1c**).

169 One of the important functions performed by *AbcA* is the export of cytolytic toxins such as Phenol  
170 Soluble Modulins (PSMs) that can lyse erythrocytes and neutrophils (20). In order to determine  
171 the effect of *AbcA* downregulation and its subsequent effect on its activity, we measured the  
172 amount of PSMs exported by WT cells, and cells that contained the promoter-associated  
173 mutations. Using 1-Butanol, PSMs were extracted from culture supernatants and re-suspended  
174 in urea, following which their ability to lyse sheep erythrocytes was measured by performing  
175 hemolysis assays as previously shown (21). It was seen that none of the strains containing  
176 promoter-associated mutations differed in their hemolytic capabilities when compared to the WT  
177 strain, as they all showed equal amounts of hemolysis at the different dilutions used (**Figure 2c**).  
178 A  $\Delta$ *agrA* strain was used as a negative control, which showed no hemolysis at all. Urea was used  
179 as a control, which by itself did not have any hemolytic abilities, whereas 0.5% Triton X-100 was  
180 used as a positive control that showed maximum hemolysis (**Figure 2d**). Along with using sheep  
181 blood for the hemolysis assay, 10x and 100x dilutions of the extracted PSMs were spotted onto  
182 blood-TSA plates to analyze differences in hemolysis levels (**Figure 2e-2g**). The pattern of

183 hemolysis seen on the plates also indicated that there was no difference in the hemolytic abilities  
184 between the WT and the mutant strains. The  $\Delta agrA$ , urea and Triton X-100 controls were used  
185 here, too. Together, these results confirmed that the  $\beta$ -lactam resistant phenotypes seen with  
186 promoter-associated mutations were due to PBP4 overexpression and that AbcA had no role in  
187 it.

188

189 ***S. aureus* strains with *pbp4* promoter-associated mutations were less virulent to**  
190 ***C. elegans* compared to the wild-type strain**

191 Along with a role in  $\beta$ -lactam resistance, PBP4 has also been associated with pathogenesis.  
192 However, its exact role, if any, remains undetermined, as there have been contrasting reports  
193 regarding PBP4's role in pathogenesis (15, 16). We attempted to understand the role of PBP4's  
194 role in pathogenesis, under wild-type and overexpressed conditions using a *C. elegans* infection  
195 model. We selected one representative strain containing promoter-associated mutations, namely  
196 SF8300 *Ppbp4\** (CRB) and used it to perform infection studies with *C. elegans*. Age synchronized  
197 worms were infected with  $1.5 \times 10^5$  bacteria and were incubated for 3 days, following which they  
198 were assessed for worm survival. Worms that responded to mechanical stimulus were considered  
199 as live, whereas worms that did not respond were counted as dead. Compared to worms infected  
200 with WT cells, where the survival rates for the worms were approximately 30%, worms infected  
201 with *Ppbp4\** (CRB) had significantly higher survival rates (55%) (SF8300 WT versus SF8300  
202 *Ppbp4\** (CRB), P-value = 0.0021) (**Figure 3a**) indicating that the presence of promoter-associated  
203 mutations led to the decreased killing and thus decreased virulence in  
204 *C. elegans*. Infection with SF8300  $\Delta pbp4$  also resulted in decreased worm survival, similar to the  
205 results obtained by infection with WT cells (SF8300 *Ppbp4\** (CRB) versus SF8300  $\Delta pbp4$ , P-  
206 value = 0.052). The *E. coli* strain OP50 was used as a control, where worms displayed 100%  
207 survival, indicating that the killing detected was due to *S. aureus* virulence.

208 We carried out further experiments with *C. elegans* infection to determine why the *Ppbbp4\** (CRB)  
209 strain showed increased survival. SF8300 WT and SF8300 *Ppbbp4\** (CRB) strains were introduced  
210 with constitutively expressing GFP and RFP respectively, via the constitutively expressing  
211 plasmid, *pTX<sub>Δ</sub>*, thus generating strains SF8300 WT + GFP and SF8300 *Ppbbp4\** (CRB) + RFP. A  
212 competition-killing assay was performed, where an equal number of SF8300 WT and SF8300  
213 *Ppbbp4\** (CRB) cells were used to infect worms. After 3 days of infection, fluorescence microscopy  
214 was carried out where the GFP and RFP signals from within the gut of each worm was was  
215 measured. On subsequent analysis of the fluorescent signals, it was observed that there was a  
216 significantly increased GFP signal detected, as compared to RFP (**Figure 3b-3d, Figure 3h**). This  
217 indicated that there was a higher proportion of SF8300 WT cells colonized within the gut of *C.*  
218 *elegans*, compared to SF8300 *Ppbbp4\** (CRB) cells; (SF8300 WT + GFP versus SF8300 *Ppbbp4\**  
219 (CRB) + RFP, P-value < 0.0001). The experiment was repeated by interchanging the plasmids  
220 containing fluorescent proteins, i.e. with the strains SF8300 WT + RFP and SF8300 *Ppbbp4\** (CRB)  
221 + GFP (**Figure 3e-3g, Figure 3i**). Here, an increased RFP signal as compared to GFP signal  
222 from within the gut of *C. elegans* was detected, ensuring that it was due to the increased  
223 colonization of SF8300 WT, and not due to a result of a potential anomaly of using fluorescent  
224 proteins (SF8300 WT + RFP versus SF8300 *Ppbbp4\** (CRB) + GFP, P-value = 0.0026).

225 Before infecting *C. elegans* with bacteria containing fluorescent proteins, the initial inoculum was  
226 plated onto tetracycline-containing TSA plates (**Figure 3j**). After determining that the initial  
227 inoculum contained a similar number of each of the bacterial strains (SF8300 WT + GFP versus  
228 SF8300 *Ppbbp4\** (CRB) + RFP, P-value = ns), *C. elegans* were subjected to lysis after 3 days of  
229 infection following which the bacteria accumulated within the gut of the worms were enumerated  
230 by performing serial dilutions of the lysate and plating them. There was a significantly higher  
231 number of GFP-expressing colonies (representing SF8300 WT) on the plate compared to RFP-  
232 expressing colonies (representing SF8300 *Ppbbp4\** (CRB)) (**Figure 3k**; SF8300 WT + GFP versus

233 SF8300 *Ppbbp4\** (CRB) + RFP, P-value < 0.0001). When plasmids were interchanged, there were  
234 increased RFP-expressing colonies (representing SF8300 WT) and decreased GFP-expressing  
235 colonies (representing SF8300 *Ppbbp4\** (CRB)) (**Figure 3l-m**). Together, the *C. elegans*  
236 experiments indicated that the SF8300 *Ppbbp4\** (CRB) was unable to colonize the *C. elegans* gut  
237 as well as SF8300 WT, leading to decreased virulence.

## 238 Discussion

239 MRSA is one of the most prominent agents contributing to the significant global antimicrobial  
240 resistance burden today (3). However, in recent years, the presence of  $\beta$ -lactam resistance in *S.*  
241 *aureus* strains without *mecA* have been reported (10, 22, 23). In previous studies, we have  
242 demonstrated the ability of PBP4 to mediate high-level  $\beta$ -lactam resistance via protein  
243 overexpression due to promoter-associated mutations in non-*mecA* strains (7, 17). In this study,  
244 we saw that PBP4 could mediate  $\beta$ -lactam resistance independent of PBP2a. As seen by the  
245 growth assays, both PBP2a and PBP4 contributed towards  $\beta$ -lactam resistance, as cells  
246 containing the promoter-associated mutations were able to survive the  $\beta$ -lactam challenge more  
247 significantly than strains that only contained PBP2a, i.e. the WT strains. This indicated that when  
248 present, PBP4 could supplement the action of PBP2a, causing a further increase in resistance  
249 and potentially leads to complications in treatment. Current clinical diagnostic and therapeutic  
250 protocols are based on categorization of the infecting strains as MRSA or MSSA as the treatment  
251 for the former is more aggressive than the latter (24). However, due to the rise in *pbp4*-associated  
252 resistance, it is likely that targeting only PBP2a for diagnosis and treatment protocols may not  
253 suffice.

254 PBP4 is a low-molecular-weight (LMW) PBP in *S. aureus* (25). LMW PBPs in other bacteria such  
255 as *E. coli* (26), *B. subtilis* (27), *L. monocytogenes* (28), *S. pneumonia* (29), etc. have been  
256 described to possess carboxypeptidase activity, allowing them to maintain the degree of cell wall  
257 crosslinking. PBP4 in *S. aureus* has transpeptidase activity along with carboxypeptidase activity,  
258 giving it the ability to perform increased, secondary cell wall cross-linking compared to other  
259 bacteria (30). Increased PBP4 expression due to promoter-associated mutations leads to a further  
260 increase in cross-linking (17, 31), indicating at PBP4's propensity towards transpeptidase activity  
261 over carboxypeptidase activity. This demonstrates the potential of PBP4 from *S. aureus* to be a  
262 powerful player in  $\beta$ -lactam resistance. The importance of PBP4 in  $\beta$ -lactam resistance was

263 further reiterated when we saw that the promoter-associated mutations studied here only led to  
264 *pbp4* upregulation, and not *abcA*. *AbcA* can export various antimicrobial agents, making it an  
265 important mediator of antibiotic resistance (14, 19). However, based on the qRTPCR analysis and  
266 hemolysis assay, it was clear that *AbcA* did not play any role in the resistant phenotype associated  
267 with the promoter mutations, and that it was all attributed to PBP4 overexpression. It is likely that  
268 the presence of mutations possibly led to altered binding of transcriptional factors to the regulatory  
269 region, leading to overexpression of PBP4. Reports have suggested that *pbp4* and *abcA*  
270 regulation are independent of each other (14), however, since the studied mutations also caused  
271 the downregulation of *abcA*, it appears that the regulation of both of these genes are at least  
272 partially interdependent, and they potentially share some of their regulatory sequences as well as  
273 some regulatory factors. Along with *AbcA*, *S. aureus* also has another known exporter of PSMs,  
274 namely the *Pmt* system (21). It is likely that *Pmt* compensated for the export of PSMs during *abcA*  
275 downregulation, allowing for similar levels of hemolytic activities between various strains.

276 In *S. aureus*, PBP4 maintains the level of peptidoglycan cross-linking by its transpeptidase and  
277 carboxypeptidase properties, thus striking a balance between appropriate cross-linking of  
278 peptidoglycan monomers and allowing for anchoring of surface proteins that are necessary for *S.*  
279 *aureus* virulence (32). Our previous studies demonstrated that this well-balanced cell wall  
280 dynamic was disrupted in the form of increased cell wall cross-linking due to overexpression of  
281 PBP4 (7, 31). However, the effect of this disruption on the abundance of surface-anchored  
282 proteins is unknown. As these surface proteins play vital roles in host attachment, colonization,  
283 and infection, we examined the virulence of a strain containing promoter-associated mutations  
284 using *C. elegans*, as this strain exhibited increased PBP4 expression. *C. elegans* has proven to  
285 be a useful infection model system to study host-pathogen interactions previously and have given  
286 multiple clues about host response to pathogenic bacteria (33). *S. aureus* cells mediate *C.*  
287 *elegans* killing by accumulating with the gut of the worm, leading to intestinal distension and

288 subsequent worm death (34). Based on our results, strains with overexpressed PBP4 were unable  
289 to colonize within the gut of the worms to a sufficient enough degree to cause high levels of  
290 accumulation and worm death, compared to the WT cells. Gut epithelial cells of *C. elegans* have  
291 been described to have similarities with human intestinal epithelial cells, suggesting the possibility  
292 that strains containing increased PBP4 expression may have decreased ability to colonize  
293 humans, as *S. aureus* has been shown to also colonize and infect human intestinal cells, making  
294 this study biologically relevant (35). It is likely that the inability of *Ppbbp4\** (CRB) cells to colonize  
295 was due to a decrease in surface-anchored proteins due to increased PBP4-mediated cross-  
296 linking of the peptidoglycan. In *S. aureus*, repeating monomers of the peptidoglycan consisting of  
297 penta-peptide stems are cross-linked via a penta-glycine bridge (36). The terminal glycine of this  
298 pentaglycine bridge forms a peptide bond with the D-alanine of the penta-peptide stem, via  
299 PBP4's transpeptidase activity (37). However, this glycine is also the site at which sortase A  
300 mediated anchoring of cell surface proteins takes place (38). Due to PBP4-mediated increase of  
301 cell wall cross-linking, we hypothesize that there aren't sufficient free glycine sites available for  
302 the sortase A mediated attachment of surface proteins, thus leading to decreased virulence  
303 **(Figure 4)**. Further studies are required to understand the biology that leads to the decreased  
304 virulence phenotype of *S. aureus* strains having *pbbp4*-promoter associated mutations, which can  
305 potentially help in exploiting this phenomenon for treatment purposes.

## 306 **Material and Methods**

307 **Bacterial strains and plasmids:** *S. aureus* strains were all cultured at 37°C in TSB (Tryptic Soy  
308 Broth), with agitation at 180 rpm. Promoter-associated mutations in *S. aureus* were introduced  
309 via Splice-Overlap PCR and allelic replacement as described previously (39), using the plasmid  
310 pJB38 (40). The GFP and RFP encoding regions were amplified from the integration plasmids  
311 pGFP-F and pRFP-F respectively (40), and were cloned into the constitutively expressing plasmid  
312 *pTX<sub>Δ</sub>* as described previously (17). The plasmid was introduced into RN4420 by electroporation,  
313 following which they were introduced in SF8300 or SF8300 *Ppbp4\** (CRB) via phage transduction  
314 using Φ11. All strains, primers and plasmids used in this study are listed in **Tables 1, 2 and 3**,  
315 respectively.

316 **Growth curve assays:** Growth assays were performed using the automated microbiology growth  
317 curve analysis system, Bioscreen C (Growth Curves USA). Overnight cultures of bacteria were  
318 diluted to OD = 0.1 in TSB with or without antibiotics, and 200 μL was added to each well of a  
319 honeycomb bioscreen C plates in triplicates. The assay was carried out for 20 hours with  
320 continuous orbital shaking at 37°C. Each condition was in triplicates, and the experiment was  
321 performed twice to ensure reproducibility.

322 **Immunoblotting:** Overnight cultures of bacteria were subcultured into 50mL flasks containing  
323 TSB such that the initial OD<sub>600</sub> of the flasks was 0.1. The cells were cultured to OD<sub>600</sub> = 1, following  
324 which cells were collected and resuspended in PBS containing CompleteMini protease inhibitor  
325 cocktail (Roche). The cells were mechanically lysed using the FastPrep (MP Biochemicals) and  
326 whole cell lysates were obtained. The cell membrane fraction was isolated from the lysates by  
327 performing ultracentrifugation at 66000 g for 1 hour (Sorvall WX Ultra 80 Centrifuge, Thermo  
328 Fisher Scientific). After resuspending the obtained pellet with PBS, protein estimation was carried  
329 out using the Pierce BCA Protein Assay kit (Thermo Fisher). The samples were separated by  
330 performing SDS-PAGE on a 10% gel, following which they were transferred onto a low-



331 fluorescence PVDF membrane (Millipore). Blocking was performed for 1 hour (5% skimmed milk  
332 in Tris buffered saline containing 0.5% Tween), primary antibody staining was carried out  
333 overnight at 4C (polyclonal anti-PBP4, custom antibody from Thermo Fisher, 1:1000) and  
334 secondary antibody staining was performed using an anti-rabbit antibody (Azure anti-rabbit  
335 NIR700, 1:20000 dilution). The blots were imaged using the Azure C600 imager and analysis was  
336 performed using ImageJ.

337 **qRT-PCR:** Overnight cultures of bacteria were subcultured into 50mL flasks containing TSB such  
338 that the initial OD<sub>600</sub> of the flasks was 0.1, and cells were allowed to grow for 4 hours, at which  
339 point 5 x 10<sup>9</sup> bacterial cells were harvested and washed. Cells were lysed using FastPrep (MP  
340 Biochemicals) following which RNA isolation was performed using the Qiagen RNeasy Mini kit.  
341 On confirmation of RNA quality, cDNA synthesis was performed using the SuperScript® IV  
342 Reverse Transcriptase (RT) kit. qRT-PCR was performed using SYBR PCR Mastermix in an ABI  
343 7500 system (Applied Biosystems) primers for *pbp4*, *abcA*, and the housekeeping gene, *gyrB*.

344 **Butanol Extraction of PSMs:** PSMs were extracted from culture supernatants as previously  
345 described (21, 41). Briefly, overnight cultures of bacteria were subcultured into 50mL flasks  
346 containing TSB such that the initial OD<sub>600</sub> of the flasks was 0.1. After 24 hours, the cells were  
347 collected, centrifuged for 30 minutes, and 30mL of supernatant from each strain was collected to  
348 which 10 mL 1-Butanol was added. The samples were mixed by shaking at 180 rpm for 2 hours  
349 at 37C. Samples were then centrifuged, and 7 mL of the upper layer from each sample was  
350 collected. The samples were dried using a vacuum centrifuge (Eppendorf) and the dried pellet  
351 was re-suspended in 8M urea. Samples were diluted 10-fold for hemolysis experiments.

352 **Hemolysis assay:** 2% sheep blood was prepared using chilled PBS and was washed twice to  
353 get rid of lysed erythrocytes. After washing, 100 µL of the blood was added to a 96 well round  
354 bottom plate, to which 100 µL of samples of PSMs extracted with butanol was added in decreasing  
355 concentrations (from 1/10<sup>th</sup> to 1/1280<sup>th</sup> of the sample). The plates were incubated for 1 hour at

356 37°C, following which they were centrifuged at 1500 rpm for 10 minutes. 100 µL of the supernatant  
357 was collected and transferred onto a flat bottom 96 well plate. Absorbance was measured at 540  
358 nm using SpectraMax M5 (Molecular Devices). 0.5% Triton was used as a control.

359 2 µL of butanol extracted PSMs was spotted onto TSA-blood plates (5% sheep blood) for each  
360 sample. Urea was spotted as a negative control and 0.5% triton was spotted as a positive control.  
361 On drying of the samples, plates were incubated at 37°C overnight.

362 ***C. elegans* – *S. aureus* infection assays:** *C. elegans* were obtained from the Caenorhabditis  
363 Genetics Center (CGC). Liquid killing assay was performed as previously described (42), with  
364 certain modifications. *C. elegans* strain used in this study was DH26 (*rrf-3(b26)* II), a temperature-  
365 sensitive, spermatogenesis defective strain. Briefly, adult hermaphrodites were age-synchronized  
366 (43) using household bleach and 5N NaOH and allowed to grow on NGM plates for 40 hours at  
367 26°C. 15 young adult worms were picked from this plate and added to 96 well plates containing  
368 100 µL liquid killing media (80% M9 buffer, 20% TSB, 100 µg/mL cholesterol, and 7.5 µg/mL  
369 Nalidixic acid) and  $1.5 \times 10^5$  *S. aureus* cells. Wells containing OP50 in media (80% M9 buffer, 20%  
370 LB and 200 µg/mL cholesterol) were included as controls. The plate was incubated at 26°C for 3  
371 days following which live and dead worms were counted. The experiment was performed thrice,  
372 in triplicates in order to ensure reproducibility.

373 For the competition assay, WT + GFP and *Ppbp4\** (CRB) + RFP cells were mixed in equal  
374 amounts before adding  $1.5 \times 10^5$  cells to each well. The media also contained 12.5 µg/mL  
375 tetracycline, which is the selection antibiotic for the *pTX<sub>Δ</sub>* plasmid.

### 376 **Fluorescence microscopy and Image analysis**

377 Fluorescence microscopy and analysis were performed as previously described (44). After 3 days  
378 of infection with *S. aureus*, worms were transferred from the wells to 1.5 mL microcentrifuge tubes.  
379 The worms were washed with M9 buffer containing 10 mM sodium azide, following which they

380 were treated with 100 µg/mL gentamicin for 30 minutes, twice. Following the gentamicin  
381 treatment, worms were washed thrice with M9 buffer containing 10 mM sodium azide. The worms  
382 were then placed onto an agar pad (2% agar) on glass slides, and fluorescence microscopy was  
383 performed using the Keyence BZ-X800 All-in-one Fluorescence microscope using the 20X  
384 objective. The exposure time and all other settings remained the same for all samples.

385 The BZX Analyzer software was used to measure fluorescence intensities within a worm. After  
386 stitching images wherever necessary, the “Hybrid cell count” function was used to select the area  
387 of the worm and measure fluorescence intensities for GFP and RFP. For each condition, at least  
388 5 worms were imaged and analyzed.

389 **Gut CFU determination:** Gut bacteria enumeration was performed as previously described (45).  
390 After the gentamicin treatment and wash steps as described above, the worms were resuspended  
391 in 250 µL M9 buffer containing 10 mM sodium azide, mixed with 200 mg 1mm Zirconia beads  
392 (Research Products International), and lysed by vortexing the tubes for 2 minutes. Before lysis,  
393 20 µL of the supernatant was collected for plating. Following lysis, samples were diluted to  $10^{-4}$   
394 and plated onto TSA plates containing tetracycline, and incubated at 37°C. The next day, colonies  
395 were counted based on the color they expressed. The experiment was performed twice, in  
396 triplicates to ensure reproducibility. Each tube contained 10 worms, and the experiment was  
397 performed twice, in triplicates.

398 **Sequencing:** Fidelity of all the mutants and plasmid constructs was validated through Sanger  
399 sequencing (Eurofins Genomics, USA).

400 **Bioinformatics and statistical analysis:** Statistical analyses were performed using GraphPad  
401 Prism. Comparisons between groups were analyzed by two-tailed Student’s t-test whenever  
402 stated. DNA sequence analysis was performed using DNASTar software.

403

404 **Acknowledgments**

405 The authors are thankful to Dr. Jenniffer Powell, Gettysburg College, for her assistance and  
406 guidance in setting up the *C. elegans* infection model system in the Chatterjee Lab. *C. elegans*  
407 strains were obtained from the Caenorhabditis Genetics Center (CGC), which is funded by NIH  
408 Office of Research Infrastructure Programs (P40 OD010440). This work was funded by NIH grant  
409 2R01AI100291 provided to Som S. Chatterjee.

## 410 **References**

- 411 1. Sakr A, Brégeon F, Mège J-L, Rolain J-M, Blin O. 2018. *Staphylococcus aureus* Nasal  
412 Colonization: An Update on Mechanisms, Epidemiology, Risk Factors, and Subsequent  
413 Infections. *Frontiers in Microbiology* 9.
- 414 2. Chambers HF, Deleo FR. 2009. Waves of resistance: *Staphylococcus aureus* in the  
415 antibiotic era. *Nature Publishing Group* 7:629-641.
- 416 3. Anonymous. 2022. Global burden of bacterial antimicrobial resistance in 2019: a  
417 systematic analysis. *Lancet* 399:629-655.
- 418 4. Bush K, Bradford PA. 2016.  $\beta$ -Lactams and  $\beta$ -Lactamase Inhibitors: An Overview. *Cold*  
419 *Spring Harb Perspect Med* 6.
- 420 5. Macheboeuf P, Contreras-Martel C, Job V, Dideberg O, Dessen A. 2006. Penicillin binding  
421 proteins: key players in bacterial cell cycle and drug resistance processes. *FEMS*  
422 *Microbiol Rev* 30:673-91.
- 423 6. Greninger AL, Chatterjee SS, Chan LC, Hamilton SM, Chambers HF, Chiu CY. 2016.  
424 Whole-Genome Sequencing of Methicillin-Resistant *Staphylococcus aureus* Resistant to  
425 Fifth-Generation Cephalosporins Reveals Potential Non-mecA Mechanisms of  
426 Resistance. *PLoS One* 11:e0149541.
- 427 7. Basuino L, Jousselin A, Alexander JAN, Strynadka NCJ, Pinho MG, Chambers HF,  
428 Chatterjee SS. 2018. PBP4 activity and its overexpression are necessary for PBP4-  
429 mediated high-level  $\beta$ -lactam resistance. *J Antimicrob Chemother* 73:1177-1180.
- 430 8. Lahiri SD, Alm RA. 2016. Identification of non-PBP2a resistance mechanisms in  
431 *Staphylococcus aureus* after serial passage with ceftaroline: involvement of other PBPs.  
432 *Journal of Antimicrobial Chemotherapy* 71:3050-3057.

- 433 9. Chan LC, Gilbert A, Basuino L, da Costa TM, Hamilton SM, Dos Santos KR, Chambers  
434 HF, Chatterjee SS. 2016. PBP 4 Mediates High-Level Resistance to New-Generation  
435 Cephalosporins in *Staphylococcus aureus*. *Antimicrob Agents Chemother* 60:3934-41.
- 436 10. Argudín MA, Roisin S, Nienhaus L, Dodemont M, de Mendonca R, Nonhoff C, Deplano A,  
437 Denis O. 2018. Genetic diversity among *Staphylococcus aureus* isolates showing oxacillin  
438 and/or cefoxitin resistance not linked to the presence of mec genes. *Antimicrob Agents*  
439 *Chemother* 62.
- 440 11. Ba X, Kalmar L, Hadjirin NF, Kerschner H, Apfalter P, Morgan FJ, Paterson GK, Girvan  
441 SL, Zhou R, Harrison EM, Holmes MA. 2019. Truncation of GdpP mediates  $\beta$ -lactam  
442 resistance in clinical isolates of *Staphylococcus aureus*. *J Antimicrob Chemother* 74:1182-  
443 1191.
- 444 12. da Costa TM, de Oliveira CR, Chambers HF, Chatterjee SS. 2018. PBP4: A New  
445 Perspective on *Staphylococcus aureus*  $\beta$ -Lactam Resistance. *Microorganisms* 6.
- 446 13. Satishkumar N, Alexander JAN, Poon R, Buggeln E, Argudín MA, Strynadka NCJ,  
447 Chatterjee SS. 2021. PBP4-mediated  $\beta$ -lactam resistance among clinical strains of  
448 *Staphylococcus aureus*. *J Antimicrob Chemother* 76:2268-2272.
- 449 14. Villet RA, Truong-Bolduc QC, Wang Y, Estabrooks Z, Medeiros H, Hooper DC. 2014.  
450 Regulation of expression of abcA and its response to environmental conditions. *J Bacteriol*  
451 196:1532-9.
- 452 15. Masters EA, de Mesy Bentley KL, Gill AL, Hao SP, Galloway CA, Salminen AT, Guy DR,  
453 McGrath JL, Awad HA, Gill SR, Schwarz EM. 2020. Identification of Penicillin Binding  
454 Protein 4 (PBP4) as a critical factor for *Staphylococcus aureus* bone invasion during  
455 osteomyelitis in mice. *PLoS Pathog* 16:e1008988.
- 456 16. Sutton JAF, Carnell OT, Lafage L, Gray J, Biboy J, Gibson JF, Pollitt EJJ, Tazoll SC,  
457 Turnbull W, Hajdamowicz NH, Salamaga B, Pidwill GR, Condliffe AM, Renshaw SA,

- 458 Vollmer W, Foster SJ. 2021. *Staphylococcus aureus* cell wall structure and dynamics  
459 during host-pathogen interaction. PLoS Pathog 17:e1009468.
- 460 17. Chatterjee SS, Chen L, Gilbert A, da Costa TM, Nair V, Datta SK, Kreiswirth BN,  
461 Chambers HF. 2017. PBP4 mediates  $\beta$ -lactam resistance by altered function. Antimicrob  
462 Agents Chemother 61.
- 463 18. Domanski TL, Bayles KW. 1995. Analysis of *Staphylococcus aureus* genes encoding  
464 penicillin-binding protein 4 and an ABC-type transporter. Gene 167:111-3.
- 465 19. Truong-Bolduc QC, Hooper DC. 2007. The transcriptional regulators NorG and MgrA  
466 modulate resistance to both quinolones and beta-lactams in *Staphylococcus aureus*.  
467 Journal of Bacteriology 189:2996-3005.
- 468 20. Yoshikai H, Kizaki H, Saito Y, Omae Y, Sekimizu K, Kaito C. 2015. Multidrug-Resistance  
469 Transporter AbcA Secretes *Staphylococcus aureus* Cytolytic Toxins. The Journal of  
470 Infectious Diseases 213:295-304.
- 471 21. Chatterjee SS, Joo HS, Duong AC, Dieringer TD, Tan VY, Song Y, Fischer ER, Cheung  
472 GY, Li M, Otto M. 2013. Essential *Staphylococcus aureus* toxin export system. Nat Med  
473 19:364-7.
- 474 22. Sommer A, Fuchs S, Layer F, Schaudinn C, Weber RE, Richard H, Erdmann MB, Laue  
475 M, Schuster CF, Werner G, Strommenger B. 2021. Mutations in the *gdpP* gene are a  
476 clinically relevant mechanism for  $\beta$ -lactam resistance in methicillin-resistant  
477 *Staphylococcus aureus* lacking mec determinants. Microbial Genomics 7.
- 478 23. Argudín MA, Dodemont M, Taguemount M, Roisin S, de Mendonca R, Deplano A, Nonhoff  
479 C, Denis O. 2017. In vitro activity of ceftaroline against clinical *Staphylococcus aureus*  
480 isolates collected during a national survey conducted in Belgian hospitals. J Antimicrob  
481 Chemother 72:56-59.
- 482 24. Holland TL, Arnold C, Fowler VG, Jr. 2014. Clinical management of *Staphylococcus*  
483 *aureus* bacteremia: a review. Jama 312:1330-41.

- 484 25. Georgopapadakou NH, Liu FY. 1980. Binding of beta-lactam antibiotics to penicillin-  
485 binding proteins of *Staphylococcus aureus* and *Streptococcus faecalis*: relation to  
486 antibacterial activity. *Antimicrob Agents Chemother* 18:834-6.
- 487 26. Peters K, Kannan S, Rao VA, Biboy J, Vollmer D, Erickson SW, Lewis RJ, Young KD,  
488 Vollmer W. 2016. The redundancy of peptidoglycan carboxypeptidases ensures robust  
489 cell shape maintenance in *Escherichia coli*. *mBio* 7.
- 490 27. Popham DL, Gilmore ME, Setlow P. 1999. Roles of low-molecular-weight penicillin-binding  
491 proteins in *Bacillus subtilis* spore peptidoglycan synthesis and spore properties. *J Bacteriol*  
492 181:126-32.
- 493 28. Korsak D, Vollmer W, Markiewicz Z. 2005. *Listeria monocytogenes* EGD lacking penicillin-  
494 binding protein 5 (PBP5) produces a thicker cell wall. *FEMS Microbiol Lett* 251:281-8.
- 495 29. Hakenbeck R, Kohiyama M. 1982. Purification of penicillin-binding protein 3 from  
496 *Streptococcus pneumoniae*. *Eur J Biochem* 127:231-6.
- 497 30. Wyke AW, Ward JB, Hayes MV, Curtis NA. 1981. A role in vivo for penicillin-binding  
498 protein-4 of *Staphylococcus aureus*. *Eur J Biochem* 119:389-93.
- 499 31. Hamilton SM, Alexander JAN, Choo EJ, Basuino L, da Costa TM, Severin A, Chung M,  
500 Aedo S, Strynadka NCJ, Tomasz A, Chatterjee SS, Chambers HF. 2017. High-Level  
501 Resistance of *Staphylococcus aureus* to  $\beta$ -Lactam Antibiotics Mediated by Penicillin-  
502 Binding Protein 4 (PBP4). *Antimicrob Agents Chemother* 61.
- 503 32. Navarre WW, Schneewind O. 1999. Surface proteins of Gram-positive bacteria and  
504 mechanisms of their targeting to the cell wall envelope. *Microbiol Mol Biol Rev* 63:174-  
505 229.
- 506 33. Powell JR, Ausubel FM. 2008. Models of *Caenorhabditis elegans* infection by bacterial  
507 and fungal pathogens. *Methods Mol Biol* 415:403-27.
- 508 34. Sifri CD, Begun J, Ausubel FM, Calderwood SB. 2003. *Caenorhabditis elegans* as a model  
509 host for *Staphylococcus aureus* pathogenesis. *Infect Immun* 71:2208-17.



- 510 35. Acton DS, Plat-Sinnige MJ, van Wamel W, de Groot N, van Belkum A. 2009. Intestinal  
511 carriage of *Staphylococcus aureus*: how does its frequency compare with that of nasal  
512 carriage and what is its clinical impact? *Eur J Clin Microbiol Infect Dis* 28:115-27.
- 513 36. Snowden MA, Perkins HR. 1990. Peptidoglycan cross-linking in *Staphylococcus aureus*.  
514 An apparent random polymerisation process. *Eur J Biochem* 191:373-7.
- 515 37. Srisuknimit V, Qiao Y, Schaefer K, Kahne D, Walker S. 2017. Peptidoglycan Cross-Linking  
516 Preferences of *Staphylococcus aureus* Penicillin-Binding Proteins Have Implications for  
517 Treating MRSA Infections. *J Am Chem Soc* 139:9791-9794.
- 518 38. Perry AM, Ton-That H, Mazmanian SK, Schneewind O. 2002. Anchoring of surface  
519 proteins to the cell wall of *Staphylococcus aureus*. III. Lipid II is an in vivo peptidoglycan  
520 substrate for sortase-catalyzed surface protein anchoring. *J Biol Chem* 277:16241-8.
- 521 39. Bae T, Schneewind O. 2006. Allelic replacement in *Staphylococcus aureus* with inducible  
522 counter-selection. *Plasmid* 55:58-63.
- 523 40. Bose JL, Fey PD, Bayles KW. 2013. Genetic tools to enhance the study of gene function  
524 and regulation in *Staphylococcus aureus*. *Appl Environ Microbiol* 79:2218-24.
- 525 41. Joo HS, Otto M. 2014. The isolation and analysis of phenol-soluble modulins of  
526 *Staphylococcus epidermidis*. *Methods Mol Biol* 1106:93-100.
- 527 42. Kong C, Yehye WA, Abd Rahman N, Tan MW, Nathan S. 2014. Discovery of potential  
528 anti-infectives against *Staphylococcus aureus* using a *Caenorhabditis elegans* infection  
529 model. *BMC Complement Altern Med* 14:4.
- 530 43. Porta-de-la-Riva M, Fontrodona L, Villanueva A, Cerón J. 2012. Basic *Caenorhabditis*  
531 *elegans* methods: synchronization and observation. *J Vis Exp* doi:10.3791/4019:e4019.
- 532 44. Rezzoagli C, Granato ET, Kümmerli R. 2019. In-vivo microscopy reveals the impact of  
533 *Pseudomonas aeruginosa* social interactions on host colonization. *Isme j* 13:2403-2414.
- 534 45. Portal-Celhay C, Bradley ER, Blaser MJ. 2012. Control of intestinal bacterial proliferation  
535 in regulation of lifespan in *Caenorhabditis elegans*. *BMC Microbiol* 12:49.

537 **Table 1: Strains used in this study**

538 **Table 2: Primers used in this study**

539 **Table3: Plasmids used in this study**

540 **Figure 1: *pbp4* promoter-associated mutations caused PBP4 overexpression and**  
541 **increased  $\beta$ -lactam resistance in MRSA strains.**

542 **(a) Schematic diagram of the *pbp4*-*Ppbp4*-*abcA* region.** The *pbp4* and *abcA*  
543 transcriptional start sites are separated by 420 bps of the promoter region. Along with the  
544 wild-type promoter (*Ppbp4* WT), promoter mutations were seen in the strain CRB (36 bp  
545 duplication at 290 bp upstream the start codon), CRT (T insertion at 377 bp and a 90 bp  
546 deletion at 275 bp upstream the start codon) and Strain 1 (T to A substitution 266 bp  
547 upstream the start codon) are represented.

548 **(b) Immunoblotting of PBP4 expression levels among selected strains.** Proteins from  
549 the membrane fraction of the WT strain (SF8300) and strains containing promoter-  
550 associated mutations (SF8300 *Ppbp4*\* (CRB), SF8300 *Ppbp4*\* (CRT) and SF8300  
551 *Ppbp4*\* (Strain 1) were probed with an antibody specific to PBP4 and were visualized for  
552 protein expression.

553 **(c) Densitometry analysis of PBP4 immunoblotting.** Compared to WT, the strains with  
554 promoter mutations had increased levels of PBP4 (48 kDa).  $\Delta pbp4$  was used as a control,  
555 where there was no PBP4 band detected.

556 **(d) Growth assay of SF8300 WT and mutant strains in the presence of 4  $\mu$ g/mL Nafcillin.**  
557 Strains containing promoter-associated mutations showed significantly enhanced survival  
558 compared to the WT and  $\Delta pbp4$  strains. (SF8300 WT versus SF8300 *Ppbp4*\* (CRB),  
559 SF8300 WT versus SF8300 *Ppbp4*\* (CRT) and SF8300 WT versus SF8300 *Ppbp4*\*  
560 (Strain 1), P-value <0.0001)

561 **(e) Growth assay of SF8300 WT and mutant strains in the presence of 8 µg/mL**  
562 **Oxacillin.** Strains containing promoter-associated mutations showed significantly  
563 enhanced survival compared to the WT and  $\Delta pbp4$  strains. (SF8300 WT versus SF8300  
564  $Ppbp4^*$  (CRB), SF8300 WT versus SF8300  $Ppbp4^*$  (CRT) and SF8300 WT versus  
565 SF8300  $Ppbp4^*$  (Strain 1), P-value <0.0001)  
566 **(f) Growth assay of SF8300 WT and mutant strains in the absence of antibiotics.** There  
567 was no significant difference in growth pattern amongst the selected isogenic strains in  
568 absence of antibiotics.

569 **Figure 2: promoter mutations cause an upregulation of *pbp4* and downregulation of *abcA***

570 **(a) qRTPCR analysis of *pbp4*.** *pbp4* transcriptional expression was significantly increased  
571 in strains containing promoter-associated mutations as compared to the WT strain.  
572 (SF8300 WT versus SF8300  $Ppbp4^*$  (CRB), P-value < 0.0001, SF8300 WT versus  
573 SF8300  $Ppbp4^*$  (CRT), P-value < 0.0001, SF8300 WT versus SF8300  $Ppbp4^*$  (Strain 1),  
574 P-value = 0.0004)  
575 **(b) qRTPCR analysis of *abcA*.** *abcA* transcriptional expression was significantly in strains  
576 containing promoter-associated mutations as compared to the WT strain. (SF8300 WT  
577 versus SF8300  $Ppbp4^*$  (CRB), P-value = 0.0161, SF8300 WT versus SF8300  $Ppbp4^*$   
578 (CRT), P-value = 0.0016, SF8300 WT versus SF8300  $Ppbp4^*$  (Strain 1), P-value =  
579 0.0203)  
580 **(c) Hemolysis assay.** Analysis of the ability of butanol extracted Phenol Soluble Modulins  
581 (PSMs) to lyse sheep erythrocytes was carried out using a hemolysis assay. There was  
582 no difference detected in the hemolytic abilities among the WT strain and strains  
583 containing promoter-associated mutations.  $\Delta agrA$  was used as a control, which showed  
584 no hemolytic activity.

585 **(d) Controls used for hemolysis assay of sheep erythrocytes.** Hemolysis assay of  
586 decreasing concentrations of 8M Urea indicated that urea in itself did not have any  
587 hemolytic ability. 0.5% Triton X-100 was used as a positive control, which showed  
588 maximum hemolysis.

589 **Analysis of the hemolytic ability of butanol extracted Phenol Soluble Modulins (PSMs)**  
590 **by spotting them onto blood agar-TSA plates.** There was no difference in hemolysis  
591 among WT and promoter mutant strains when PSMs were:

592 **(e)** diluted 10 times

593 **(f)** diluted 100 times

594 **(g)** Diameter of the hemolytic zone detected on the blood agar-TSA plates for PSMs from  
595 the selected strains.

596 **Figure 3: Cells with overexpressed PBP4 have decreased virulence**

597 **(a) *C. elegans* infection assay.** Killing assay with isogenic strains demonstrated that SF8300  
598 WT and SF8300  $\Delta pbb4$  strains had decreased worm survival (30%) compared to SF8300  
599 *Ppbb4\** (CRB), that had increased worm survival (55%) indicating at decreased *S. aureus*  
600 virulence. (SF8300 WT versus SF8300 *Ppbb4\** (CRB), P-value = 0.0021, SF8300 *Ppbb4\**  
601 (CRB) versus SF8300  $\Delta pbb4$ , P-value = 0.052, SF8300 WT versus SF8300  $\Delta pbb4$ , P-  
602 value = ns)

603 **Fluorescence microscopy.** Microscopy for *C. elegans* infected with GFP or RFP expressing  
604 isogenic strains demonstrated that SF8300 *Ppbb4\** (CRB) had a significantly decreased ability to  
605 colonize *C. elegans* compared to WT, after 3 days of infection using a 20X objective lens. Scale  
606 bar = 20  $\mu$ m.

607 **(b)** Infection of *C. elegans* with SF8300 WT + GFP

608 **(c)** Infection of *C. elegans* with SF8300 *Ppbb4\** (CRB) + RFP

- 609        **(d)** Merged image of *C. elegans* infected with SF8300 WT + GFP and SF8300 *Ppbbp4\** (CRB)  
610            + RFP
- 611        **(e)** Infection of *C. elegans* with SF8300 WT + RFP
- 612        **(f)** Infection of *C. elegans* with SF8300 *Ppbbp4\** (CRB) + GFP
- 613        **(g)** Merged image of *C. elegans* infected with SF8300 WT + RFP and SF8300 *Ppbbp4\** (CRB)  
614            + GFP.

615        **Analysis of GFP and RFP signals following fluorescent microscopy of *C. elegans* infected**  
616        **with:**

- 617        **(h)** An equal number of SF8300 WT + GFP and SF8300 *Ppbbp4\** (CRB) + RFP demonstrated  
618            that there was a significantly increased GFP signal compared to RFP signal from within  
619            the worms analyzed (N = 5) indicating that there was increased colonization of the WT  
620            strain compared to *Ppbbp4\** (CRB). SF8300 WT + GFP versus SF8300 *Ppbbp4\** (CRB) +  
621            RFP, P-value < 0.0001.
- 622        **(i)** Equal number of SF8300 WT + RFP) and SF8300 *Ppbbp4\** (CRB) + GFP) demonstrated  
623            that there was significantly increased RFP signal compared to GFP signal from within the  
624            worms analyzed (N = 5) indicating that there was increased colonization of the WT strain  
625            compared to *Ppbbp4\** (CRB). SF8300 WT + RFP) versus SF8300 *Ppbbp4\** (CRB) + GFP,  
626            P-value = 0.0026.

627        **CFU determination.**

- 628        **(j)** Inoculum on Day 0, before *C. elegans* infection with SF8300 WT + GFP and SF8300  
629            *Ppbbp4\** (CRB) + RFP demonstrated that cells of each strain were used in similar  
630            proportions. SF8300 WT + GFP versus SF8300 *Ppbbp4\** (CRB) + RFP, P-value = ns.
- 631        **(k)** Plating of bacteria obtained from the gut of *C. elegans* after 3 days of infection with  
632            bacteria indicated that there was a higher proportion of GFP expressing SF8300 WT

633 colony forming units (CFU) compared to RFP expressing SF8300 *Ppbbp4\** (CRB) CFUs.  
634 SF8300 WT + GFP versus SF8300 *Ppbbp4\** (CRB) + RFP, P-value < 0.0001.

635 (l) Inoculum on Day 0, before *C. elegans* infection with SF8300 WT + RFP and SF8300  
636 *Ppbbp4\** (CRB) + GFP demonstrated that cells of each strain were used in similar  
637 proportions. SF8300 WT + RFP versus SF8300 *Ppbbp4\** (CRB) + GFP, P-value = ns.

638 (m) Plating of bacteria obtained from the gut of *C. elegans* after 3 days of infection with  
639 bacteria indicated that there was a higher proportion of RFP expressing SF8300 WT CFUs  
640 compared to GFP expressing SF8300 *Ppbbp4\** (CRB) CFUs. SF8300 WT + RFP versus  
641 SF8300 *Ppbbp4\** (CRB) + GFP, P-value = 0.0001.

642 **Figure 4: Increased cell-wall cross-linking due to PBP4 overexpression can result in**  
643 **decreased anchoring of sortase A mediated cell surface associated proteins.**

**Table 1: Strains used in this study**

| Strains                                                            | Notes                                                          | Reference                      |
|--------------------------------------------------------------------|----------------------------------------------------------------|--------------------------------|
| <i>E. coli</i> DH5 $\alpha$<br>RN4220                              | Laboratory <i>S. aureus</i> strain                             | Invitrogen<br>BEI<br>Resources |
| SF8300                                                             | USA300 MRSA clinical isolate                                   | 9                              |
| SF8300 $\Delta pbbp4$                                              | SF8300 devoid of <i>pbbp4</i>                                  | 9                              |
| SF8300 <i>Ppbbp4*</i> (CRB)                                        | SF8300 with CRB promoter mutations                             | This study                     |
| SF8300 <i>Ppbbp4*</i> (CRT)                                        | SF8300 with CRT promoter mutations                             | This study                     |
| SF8300 <i>Ppbbp4*</i> (Strain 1)                                   | SF8300 with Strain 1 promoter mutations                        | This study                     |
| SF8300+ p <i>Tx<math>\Delta</math></i> (GFP)                       | SF8300 with constitutively expressing GFP                      | This study                     |
| SF8300 <i>Ppbbp4*</i> (CRB)+ p <i>Tx<math>\Delta</math></i> (GFP)  | SF8300 <i>Ppbbp4*</i> (CRB) with constitutively expressing GFP | This study                     |
| SF8300 + p <i>Tx<math>\Delta</math></i> (RFP)                      | SF8300 with constitutively expressing GFP                      | This study                     |
| SF8300 <i>Ppbbp4*</i> (CRB) + p <i>Tx<math>\Delta</math></i> (RFP) | SF8300 <i>Ppbbp4*</i> (CRB) with constitutively expressing RFP | This study                     |

**Table 2: Primers used in this study**

| Primer                            | Sequence (5'-3')                                                                         | Use                                                     |
|-----------------------------------|------------------------------------------------------------------------------------------|---------------------------------------------------------|
| PBP4-P1                           | ggggacaagttgtacaaaaagcaggctAGTTTGC<br>AATTCAGATTGTGTACTIONGTGCGATATCT<br>TTGCATAATACGACC | <i>pbp4</i> deletion using<br>pJB38                     |
| PBP4-P2                           | AAAGCGTAACTTCCCTTTTCCAATTCT<br>TAAATATCCCTAAAAGC                                         | <i>pbp4</i> deletion using<br>pJB38                     |
| PBP4-P3                           | AAAAGGGAAGATTAACGCTTTAACATACT<br>AAAAACGGACAAGTTGCACATTATAAAG<br>CTGCGAACTTGTCCG         | <i>pbp4</i> deletion using<br>pJB38                     |
| PBP4-P4                           | ggggaccacttgtacaagaaagctgggtGAAGATTT<br>TAATAGATATATCACAGAAATTATGAAAA<br>TAAGACAACG      | <i>pbp4</i> deletion using<br>pJB38                     |
| <i>Ppbp4</i> *-plmay-Not1-<br>for | AGTTTGCggccgCAGATTGTGTACTIONGTGCG<br>ATATCTTTTG                                          | Cloning of <i>Ppbp4</i> into<br>the plasmid plmay       |
| <i>Ppbp4</i> * plmay-kpn1-<br>rev | TCTTggTACcTTGTTGGTGCAAATGTACGT<br>AATCTTG                                                | Cloning of <i>Ppbp4</i> into<br>the plasmid plmay       |
| <i>Ppbp4</i> * (CRB)-rev          | ACAAAAAATGCAATAGAAATATTCTATCA<br>TATAAATGTTATGAGCGGTATTTTG                               | Introduction of CRB<br>mutations in <i>Ppbp4</i> *      |
| <i>Ppbp4</i> * (CRB)-for          | ATATTTCTATTGCATTTTTTTGTATTTATAT<br>GATAGAATATTTCTATTGC                                   | Introduction of CRB<br>mutations in <i>Ppbp4</i> *      |
| <i>Ppbp4</i> *-(CRT)-kpn1-<br>rev | ATTggtaccAGATACTGTAATTTGTAATAGG<br>TCTGCGATTG                                            | Introduction of CRT<br>mutations in <i>Ppbp4</i> *      |
| <i>Ppbp4</i> *_Strain 1_for       | TATATGATAGAATATTTCTATaGCATTTTT<br>TG                                                     | Introduction of Strain 1<br>mutations in <i>Ppbp4</i> * |
| <i>Ppbp4</i> *_Strain 1_rev       | ATTACAAAAAATGcIATAGAAATATTCTAT<br>C                                                      | Introduction of Strain 1<br>mutations in <i>Ppbp4</i> * |
| GFP_BamHI_FP                      | AGgATcCTAAAAAGTGAATAGAGGTGGAA<br>TAatgtcaaaaggagaagaattatttacag                          | Cloning GFP into pTx $\Delta$                           |
| GFP_MluI_RP                       | ATacgcgttacttatataattcatcc                                                               | Cloning GFP into pTx $\Delta$                           |
| RFP_BamH1_FP                      | ATATggatccTGATTAACCTTTATAAGGAGG                                                          | Cloning RFP into pTx $\Delta$                           |
| RFP_Mull_RP                       | ATacgcgtTTATAAAAAACAAATGATGACG                                                           | Cloning RFP into pTx $\Delta$                           |



**Table 3: Plasmids used in this study**

| <b>Plasmid</b>                       | <b>Notes</b>                                 | <b>Reference</b> |
|--------------------------------------|----------------------------------------------|------------------|
| pImay + <i>Ppbbp4</i> (CRB)          | Insertion of <i>Ppbbp4</i> promoter mutation | This study       |
| pJB38 + <i>Ppbbp4</i> (CRT)          | Insertion of <i>Ppbbp4</i> promoter mutation | This study       |
| pJB38 + <i>Ppbbp4</i> (Strain 1)     | Insertion of <i>Ppbbp4</i> promoter mutation | This study       |
| pJB38 + $\Delta pbbp4$               | Deletion of <i>pbbp4</i>                     |                  |
| p <i>Tx<math>\Delta</math></i> + GFP | Constitutive expression of GFP               | This study       |
| p <i>Tx<math>\Delta</math></i> + RFP | Constitutive expression of RFP               | This study       |

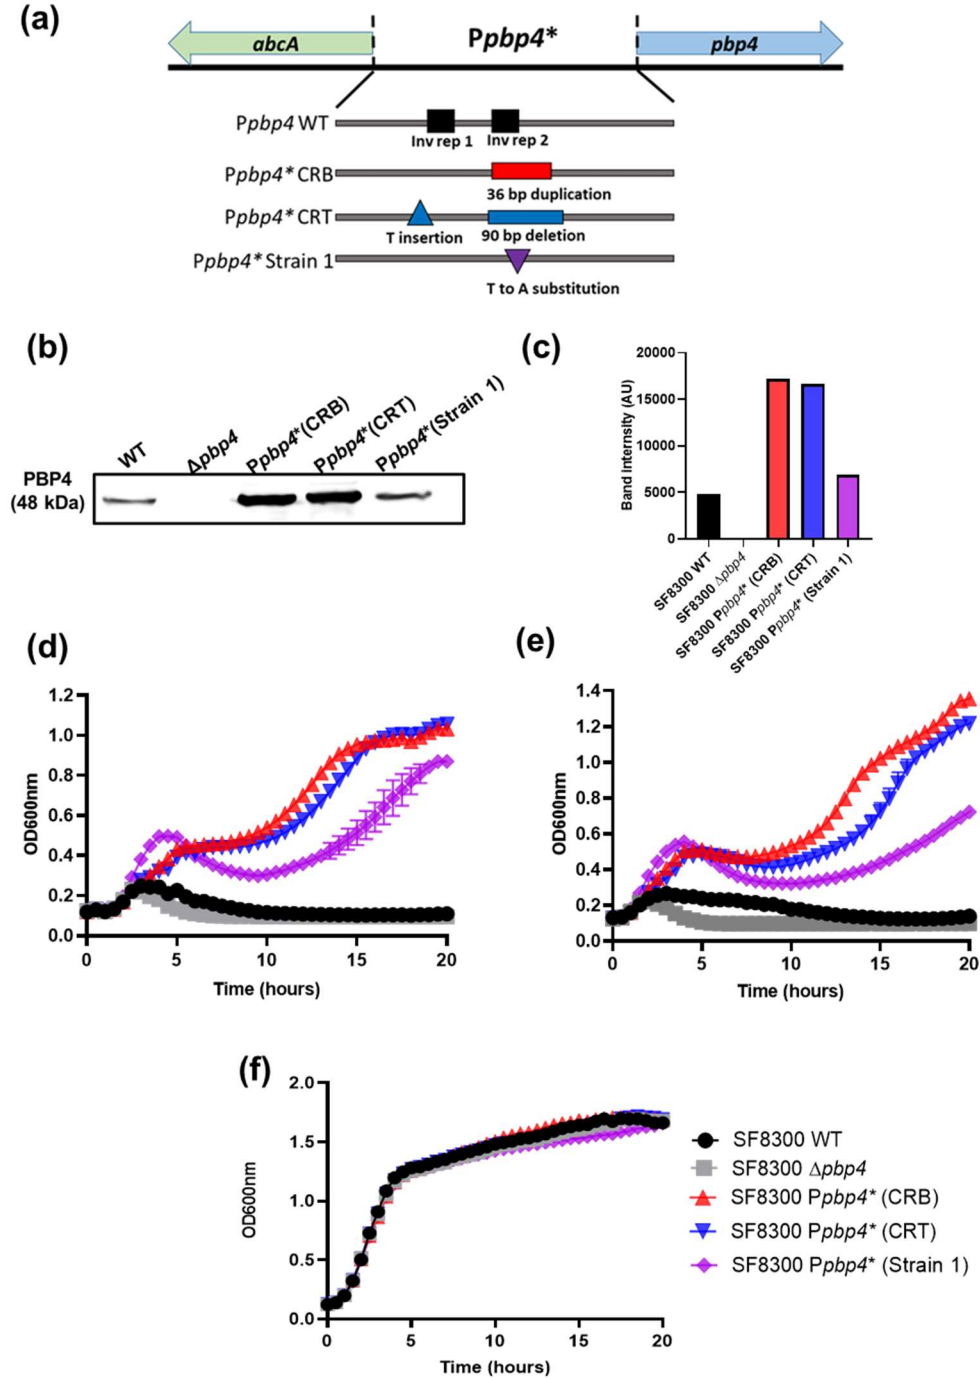

**Figure 1: *pbp4* promoter-associated mutations caused PBP4 overexpression and increased  $\beta$ -lactam resistance in MRSA strains.**

- (a) Schematic diagram of the *pbp4-Ppbp4-abcA* region.** The *pbp4* and *abcA* transcriptional start sites are separated by 420 bps of the promoter region. Along with the wild-type promoter (*Ppbp4* WT), promoter mutations were seen in the strain CRB (36 bp duplication at 290 bp upstream the start codon), CRT (T insertion at 377 bp and a 90 bp deletion at 275 bp upstream the start codon) and Strain 1 (T to A substitution 266 bp upstream the start codon) are represented.
- (b) Immunoblotting of PBP4 expression levels among selected strains.** Proteins from the membrane fraction of the WT strain (SF8300) and strains containing promoter-associated mutations (SF8300 *Ppbp4*\* (CRB), SF8300 *Ppbp4*\* (CRT) and SF8300 *Ppbp4*\* (Strain 1) were probed with an antibody specific to PBP4 and were visualized for protein expression.
- (c) Densitometry analysis of PBP4 immunoblotting.** Compared to WT, the strains with promoter mutations had increased levels of PBP4 (48 kDa).  $\Delta pbp4$  was used as a control, where there was no PBP4 band detected.
- (d) Growth assay of SF8300 WT and mutant strains in the presence of 4  $\mu\text{g/mL}$  Nafcillin.** Strains containing promoter-associated mutations showed significantly enhanced survival compared to the WT and  $\Delta pbp4$  strains. (SF8300 WT versus SF8300 *Ppbp4*\* (CRB), SF8300 WT versus SF8300 *Ppbp4*\* (CRT) and SF8300 WT versus SF8300 *Ppbp4*\* (Strain 1), P-value <0.0001)
- (e) Growth assay of SF8300 WT and mutant strains in the presence of 8  $\mu\text{g/mL}$  Oxacillin.** Strains containing promoter-associated mutations showed significantly enhanced survival compared to the WT and  $\Delta pbp4$  strains. (SF8300 WT versus SF8300 *Ppbp4*\* (CRB), SF8300 WT versus SF8300 *Ppbp4*\* (CRT) and SF8300 WT versus SF8300 *Ppbp4*\* (Strain 1), P-value <0.0001)

**(f) Growth assay of SF8300 WT and mutant strains in the absence of antibiotics.** There was no significant difference in growth pattern amongst the selected isogenic strains in absence of antibiotics.

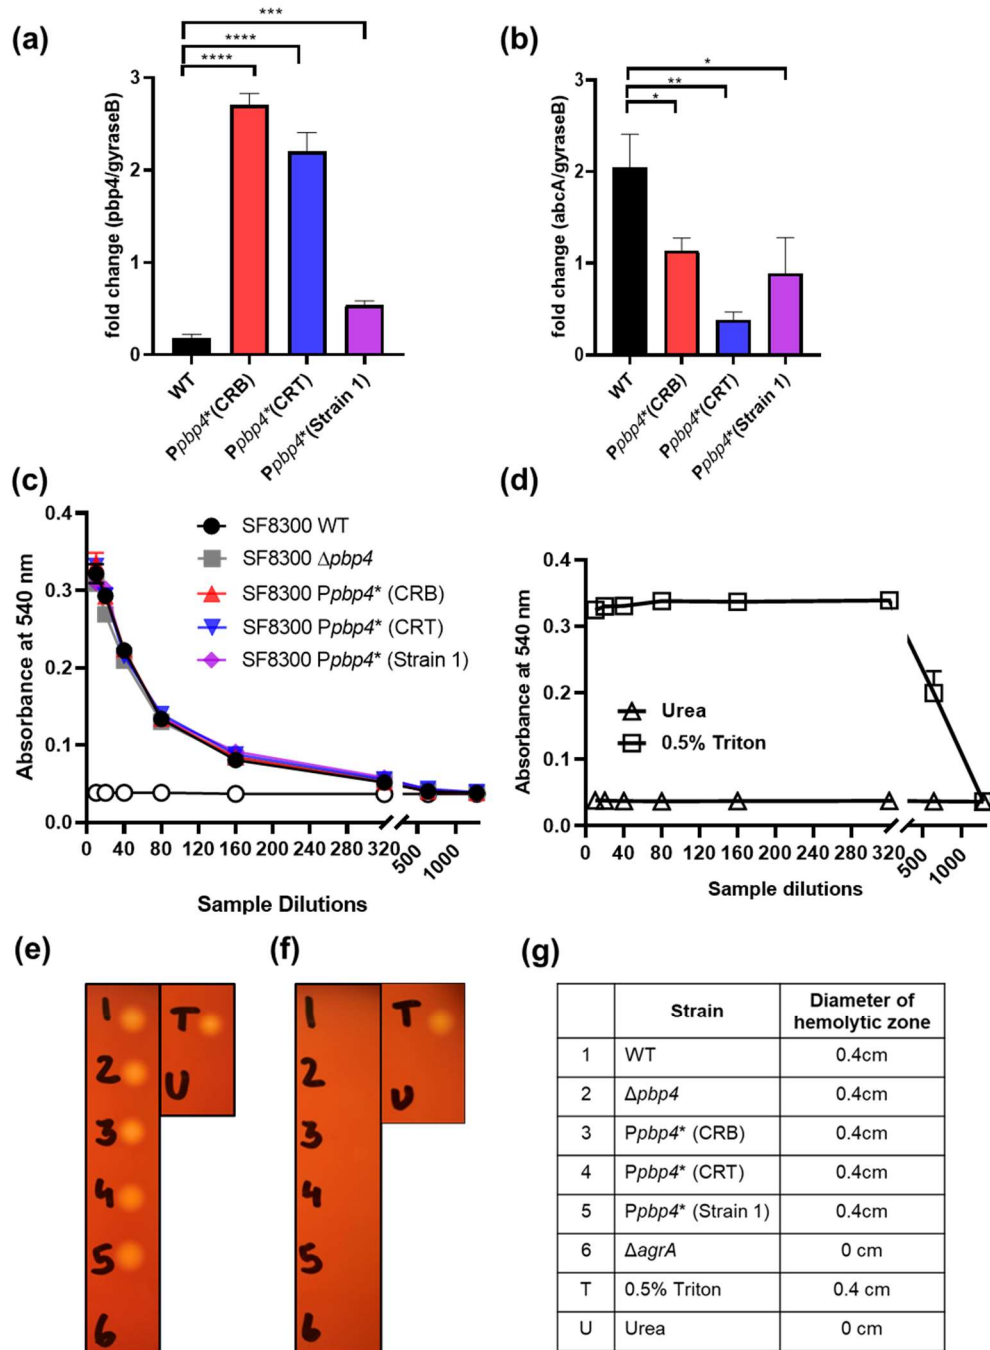

Figure 2: promoter mutations cause an upregulation of *pbp4* and downregulation of *abcA*

(a) qRT-PCR analysis of *pbp4*. *pbp4* transcriptional expression was significantly increased in strains containing promoter-associated mutations as compared to the WT strain.

(SF8300 WT versus SF8300 *Ppbbp4\** (CRB), P-value < 0.0001, SF8300 WT versus SF8300 *Ppbbp4\** (CRT), P-value < 0.0001, SF8300 WT versus SF8300 *Ppbbp4\** (Strain 1), P-value = 0.0004)

**(b) qRTPCR analysis of *abcA*.** *abcA* transcriptional expression was significantly in strains containing promoter-associated mutations as compared to the WT strain. (SF8300 WT versus SF8300 *Ppbbp4\** (CRB), P-value = 0.0161, SF8300 WT versus SF8300 *Ppbbp4\** (CRT), P-value = 0.0016, SF8300 WT versus SF8300 *Ppbbp4\** (Strain 1), P-value = 0.0203)

**(c) Hemolysis assay.** Analysis of the ability of butanol extracted Phenol Soluble Modulins (PSMs) to lyse sheep erythrocytes was carried out using a hemolysis assay. There was no difference detected in the hemolytic abilities among the WT strain and strains containing promoter-associated mutations. *ΔagrA* was used as a control, which showed no hemolytic activity.

**(d) Controls used for hemolysis assay of sheep erythrocytes.** Hemolysis assay of decreasing concentrations of 8M Urea indicated that urea in itself did not have any hemolytic ability. 0.5% Triton X-100 was used as a positive control, which showed maximum hemolysis.

**Analysis of the hemolytic ability of butanol extracted Phenol Soluble Modulins (PSMs) by spotting them onto blood agar-TSA plates.** There was no difference in hemolysis among WT and promoter mutant strains when PSMs were:

**(e)** diluted 10 times

**(f)** diluted 100 times

**(g)** Diameter of the hemolytic zone detected on the blood agar-TSA plates for PSMs from the selected strains.

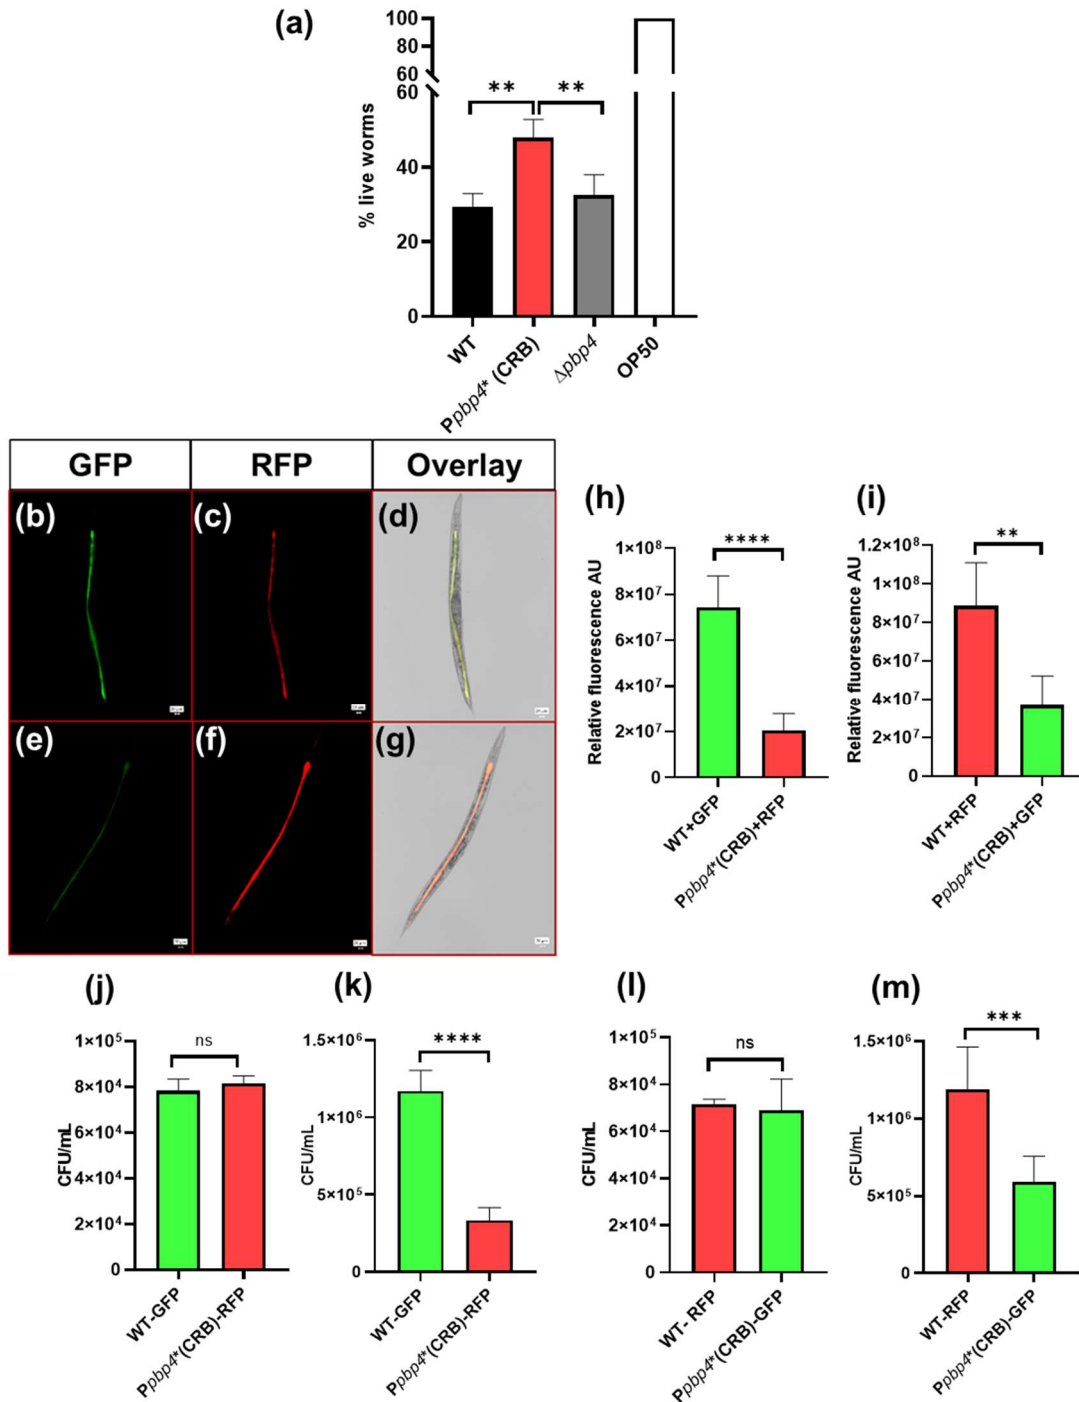

**Figure 3: Cells with overexpressed PBP4 have decreased virulence**

**(a) *C. elegans* infection assay.** Killing assay with isogenic strains demonstrated that SF8300 WT and SF8300  $\Delta pbp4$  strains had decreased worm survival (30%) compared to SF8300 *Ppbp4\** (CRB), that had increased worm survival (55%) indicating at decreased *S. aureus*

virulence. (SF8300 WT versus SF8300 *Ppbbp4\** (CRB), P-value = 0.0021, SF8300 *Ppbbp4\** (CRB) versus SF8300  $\Delta pbbp4$ , P-value = 0.052, SF8300 WT versus SF8300  $\Delta pbbp4$ , P value = ns)

**Fluorescence microscopy.** Microscopy for *C. elegans* infected with GFP or RFP expressing isogenic strains demonstrated that SF8300 *Ppbbp4\** (CRB) had a significantly decreased ability to colonize *C. elegans* compared to WT, after 3 days of infection using a 20X objective lens. Scale bar = 20  $\mu$ m.

(b) Infection of *C. elegans* with SF8300 WT + GFP

(c) Infection of *C. elegans* with SF8300 *Ppbbp4\** (CRB) + RFP

(d) Merged image of *C. elegans* infected with SF8300 WT + GFP and SF8300 *Ppbbp4\** (CRB) + RFP

(e) Infection of *C. elegans* with SF8300 WT + RFP

(f) Infection of *C. elegans* with SF8300 *Ppbbp4\** (CRB) + GFP

(g) Merged image of *C. elegans* infected with SF8300 WT + RFP and SF8300 *Ppbbp4\** (CRB) + GFP.

**Analysis of GFP and RFP signals following fluorescent microscopy of *C. elegans* infected with:**

(h) An equal number of SF8300 WT + GFP and SF8300 *Ppbbp4\** (CRB) + RFP demonstrated that there was a significantly increased GFP signal compared to RFP signal from within the worms analyzed (N = 5) indicating that there was increased colonization of the WT strain compared to *Ppbbp4\** (CRB). SF8300 WT + GFP versus SF8300 *Ppbbp4\** (CRB) + RFP, P-value < 0.0001.

(i) Equal number of SF8300 WT + RFP) and SF8300 *Ppbbp4\** (CRB) + GFP) demonstrated that there was significantly increased RFP signal compared to GFP signal from within the



worms analyzed (N = 5) indicating that there was increased colonization of the WT strain compared to *Ppbbp4\** (CRB). SF8300 WT + RFP versus SF8300 *Ppbbp4\** (CRB) + GFP, P-value = 0.0026.

#### **CFU determination.**

- (j) Inoculum on Day 0, before *C. elegans* infection with SF8300 WT + GFP and SF8300 *Ppbbp4\** (CRB) + RFP demonstrated that cells of each strain were used in similar proportions. SF8300 WT + GFP versus SF8300 *Ppbbp4\** (CRB) + RFP, P-value = ns.
- (k) Plating of bacteria obtained from the gut of *C. elegans* after 3 days of infection with bacteria indicated that there was a higher proportion of GFP expressing SF8300 WT colony forming units (CFU) compared to RFP expressing SF8300 *Ppbbp4\** (CRB) CFUs. SF8300 WT + GFP versus SF8300 *Ppbbp4\** (CRB) + RFP, P-value < 0.0001.
- (l) Inoculum on Day 0, before *C. elegans* infection with SF8300 WT + RFP and SF8300 *Ppbbp4\** (CRB) + GFP demonstrated that cells of each strain were used in similar proportions. SF8300 WT + RFP versus SF8300 *Ppbbp4\** (CRB) + GFP, P-value = ns.
- (m) Plating of bacteria obtained from the gut of *C. elegans* after 3 days of infection with bacteria indicated that there was a higher proportion of RFP expressing SF8300 WT CFUs compared to GFP expressing SF8300 *Ppbbp4\** (CRB) CFUs. SF8300 WT + RFP versus SF8300 *Ppbbp4\** (CRB) + GFP, P-value = 0.0001.

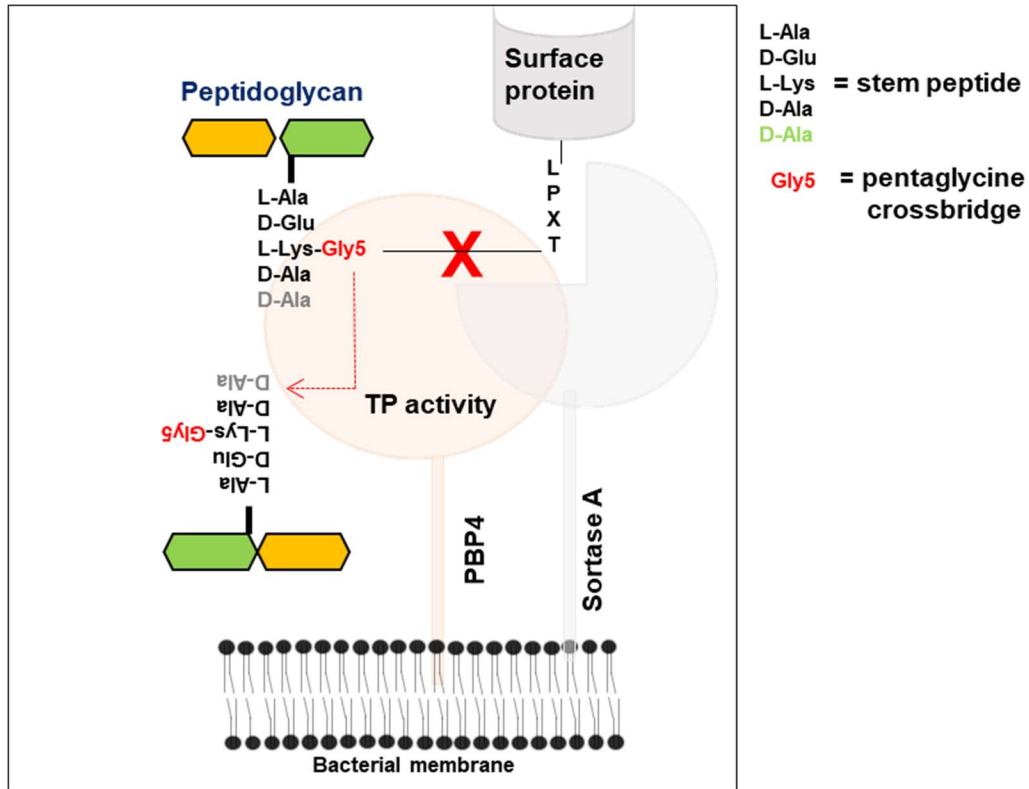

**Figure 4: Increased cell-wall cross-linking due to PBP4 overexpression can result in decreased anchoring of sortase A mediated cell surface associated proteins.**
